# Supplementary material
Source: publisher figshare collection journal article supplement (https://acs.figshare.com/ndownloader/files/5881119)
Supplement: Supplementary file 1 [file 5881119]

# om020180g.cif

data_manuscript_number  'OM020180G'
data_manuscript_title
'(REVISED VERSION) Heterobinuclear Complexes of Manganese and Molybdenum Containing Aminoacidato and Related O,N and S,N Bridges'

_pub_requested_journal 'Organometallics'


_audit_creation_method            SHELXL

_publ_contact_author
;
     DANIEL MIGUEL
     
     Departamento de Quimica Inorganica
     Facultad de Ciencias
     Universidad de Valladolid
     C/ Prado de la Magdalena s/n
     47005 Valladolid
     SPAIN
;

_publ_contact_author_phone          '+34-983-423232
_publ_contact_author_fax            '+34-983-423013
_publ_contact_author_email          'dmsj@qi.uva.es'

;
loop_
    _publ_author_name
    _publ_author_address

     'Belen Galan'
;
     Departamento de Quimica Inorganica
     Facultad de Ciencias
     Universidad de Valladolid
     C/ Prado de la Magdalena s/n
     47005 Valladolid
     SPAIN
;
     'Daniel Miguel'
;
     Departamento de Quimica Inorganica
     Facultad de Ciencias
     Universidad de Valladolid
     C/ Prado de la Magdalena s/n
     47005 Valladolid
     SPAIN
;
     'Julio Perez'
;    
     Departamento de Quimica Organica e Inorganica/IUQOEM-Facultad de Qu�mica
     Universidad de Oviedo
     C/ Julian Claveria s/n
     33006 Oviedo  (ASTURIAS)
     SPAIN
;

    'Victor Riera'
;    
     Departamento de Quimica Organica e Inorganica/IUQOEM-Facultad de Qu�mica
     Universidad de Oviedo
     C/ Julian Claveria s/n
     33006 Oviedo  (ASTURIAS)
     SPAIN
;


#-------------------------- data section of block---------------------------
  

data_Compound_2_(metoxi) 

 
_audit_creation_method            SHELXL-97 
_chemical_name_systematic 
; 
 ? 
; 
_chemical_name_common             ? 
_chemical_melting_point           ? 
_chemical_formula_moiety          ? 
_chemical_formula_sum 
 'C26 H36 Mn Mo O7 P S2' 
_chemical_formula_weight          706.52 
  
loop_ 
 _atom_type_symbol 
 _atom_type_description 
 _atom_type_scat_dispersion_real 
 _atom_type_scat_dispersion_imag 
 _atom_type_scat_source 
 'Mo'  'Mo'  -1.6832   0.6857 
 'International Tables Vol C Tables 4.2.6.8 and 6.1.1.4' 
 'Mn'  'Mn'   0.3368   0.7283 
 'International Tables Vol C Tables 4.2.6.8 and 6.1.1.4' 
 'S'  'S'   0.1246   0.1234 
 'International Tables Vol C Tables 4.2.6.8 and 6.1.1.4' 
 'C'  'C'   0.0033   0.0016 
 'International Tables Vol C Tables 4.2.6.8 and 6.1.1.4' 
 'P'  'P'   0.1023   0.0942 
 'International Tables Vol C Tables 4.2.6.8 and 6.1.1.4' 
 'O'  'O'   0.0106   0.0060 
 'International Tables Vol C Tables 4.2.6.8 and 6.1.1.4' 
 'H'  'H'   0.0000   0.0000 
 'International Tables Vol C Tables 4.2.6.8 and 6.1.1.4' 
  
_symmetry_cell_setting            Triclinic 
_symmetry_space_group_name_H-M    P-1 
  
loop_ 
 _symmetry_equiv_pos_as_xyz 
 'x, y, z' 
 '-x, -y, -z' 
  
_cell_length_a                    10.4330(12) 
_cell_length_b                    10.7602(12) 
_cell_length_c                    14.4245(16) 
_cell_angle_alpha                 78.610(2) 
_cell_angle_beta                  88.482(2) 
_cell_angle_gamma                 77.344(2) 
_cell_volume                      1548.6(3) 
_cell_formula_units_Z             2 
_cell_measurement_temperature     293(2) 
_cell_measurement_reflns_used     ? 
_cell_measurement_theta_min       ? 
_cell_measurement_theta_max       ? 
  
_exptl_crystal_description        ? 
_exptl_crystal_colour             'DEEP GREEN' 
_exptl_crystal_size_max           0.40  
_exptl_crystal_size_mid           0.30 
_exptl_crystal_size_min           0.15 
_exptl_crystal_density_meas       ? 
_exptl_crystal_density_diffrn     1.515 
_exptl_crystal_density_method     'not measured' 
_exptl_crystal_F_000              724 
_exptl_absorpt_coefficient_mu     1.039 
_exptl_absorpt_correction_type    'sadabs' 
_exptl_absorpt_correction_T_min   0.807444
_exptl_absorpt_correction_T_max   1.000000 
_exptl_absorpt_process_details    ? 
  
_exptl_special_details 
; 
 ? 
; 
  
_diffrn_ambient_temperature       293(2) 
_diffrn_radiation_wavelength      0.71073 
_diffrn_radiation_type            MoK\a 
_diffrn_radiation_source          'fine-focus sealed tube' 
_diffrn_radiation_monochromator   graphite 
_diffrn_measurement_device_type   'CCD area detector' 
_diffrn_measurement_method        'phi and omega scans' 
_diffrn_detector_area_resol_mean  ? 
_diffrn_standards_number          ? 
_diffrn_standards_interval_count  ? 
_diffrn_standards_interval_time   ? 
_diffrn_standards_decay_%         ? 
_diffrn_reflns_number             6943 
_diffrn_reflns_av_R_equivalents   0.0224 
_diffrn_reflns_av_sigmaI/netI     0.0249 
_diffrn_reflns_limit_h_min        -11 
_diffrn_reflns_limit_h_max        11 
_diffrn_reflns_limit_k_min        -11 
_diffrn_reflns_limit_k_max        11 
_diffrn_reflns_limit_l_min        -10 
_diffrn_reflns_limit_l_max        16 
_diffrn_reflns_theta_min          1.98 
_diffrn_reflns_theta_max          23.30 
_reflns_number_total              4352 
_reflns_number_gt                 3670 
_reflns_threshold_expression      >2sigma(I) 
  
_computing_data_collection        'Bruker SMART' 
_computing_cell_refinement        'Bruker SMART' 
_computing_data_reduction         'Bruker SHELXTL' 
_computing_structure_solution     'SHELXS-97 (Sheldrick, 1990)' 
_computing_structure_refinement   'SHELXL-97 (Sheldrick, 1997)' 
_computing_molecular_graphics     'Bruker SHELXTL' 
_computing_publication_material   'Bruker SHELXTL' 
  
_refine_special_details 
; 
 Refinement of F^2^ against ALL reflections.  The weighted R-factor wR and 
 goodness of fit S are based on F^2^, conventional R-factors R are based 
 on F, with F set to zero for negative F^2^. The threshold expression of 
 F^2^ > 2sigma(F^2^) is used only for calculating R-factors(gt) etc. and is 
 not relevant to the choice of reflections for refinement.  R-factors based 
 on F^2^ are statistically about twice as large as those based on F, and R- 
 factors based on ALL data will be even larger. 
; 
  
_refine_ls_structure_factor_coef  Fsqd 
_refine_ls_matrix_type            full 
_refine_ls_weighting_scheme       calc 
_refine_ls_weighting_details 
 'calc w=1/[\s^2^(Fo^2^)+(0.0350P)^2^+3.9653P] where P=(Fo^2^+2Fc^2^)/3' 
_atom_sites_solution_primary      direct 
_atom_sites_solution_secondary    difmap 
_atom_sites_solution_hydrogens    geom 
_refine_ls_hydrogen_treatment     mixed 
_refine_ls_extinction_method      SHELXL 
_refine_ls_extinction_coef        0.0021(4) 
_refine_ls_extinction_expression 
 'Fc^*^=kFc[1+0.001xFc^2^\l^3^/sin(2\q)]^-1/4^' 
_refine_ls_number_reflns          4352 
_refine_ls_number_parameters      344 
_refine_ls_number_restraints      0 
_refine_ls_R_factor_all           0.0537 
_refine_ls_R_factor_gt            0.0398 
_refine_ls_wR_factor_ref          0.1085 
_refine_ls_wR_factor_gt           0.0973 
_refine_ls_goodness_of_fit_ref    1.154 
_refine_ls_restrained_S_all       1.154 
_refine_ls_shift/su_max           0.024 
_refine_ls_shift/su_mean          0.003 
  
loop_ 
 _atom_site_label 
 _atom_site_type_symbol 
 _atom_site_fract_x 
 _atom_site_fract_y 
 _atom_site_fract_z 
 _atom_site_U_iso_or_equiv 
 _atom_site_adp_type 
 _atom_site_occupancy 
 _atom_site_symmetry_multiplicity 
 _atom_site_calc_flag 
 _atom_site_refinement_flags 
 _atom_site_disorder_assembly 
 _atom_site_disorder_group 
Mo1 Mo 0.74175(4) 0.77732(4) 0.79849(3) 0.04187(17) Uani 1 1 d . . . 
Mn1 Mn 0.72550(9) 0.63470(8) 0.62981(6) 0.0522(3) Uani 1 1 d . . . 
S1 S 0.59385(13) 0.62924(12) 0.77188(9) 0.0443(3) Uani 1 1 d . . . 
S2 S 0.62777(13) 0.85806(13) 0.63993(9) 0.0433(3) Uani 1 1 d . . . 
C1 C 0.5463(5) 0.8018(5) 0.7440(3) 0.0386(11) Uani 1 1 d . . . 
P1 P 0.38256(12) 0.88085(13) 0.77142(9) 0.0381(3) Uani 1 1 d . . . 
C2 C 0.6682(5) 0.8865(5) 0.8877(4) 0.0501(13) Uani 1 1 d . . . 
O2 O 0.6386(4) 0.9522(4) 0.9441(3) 0.0664(11) Uani 1 1 d . . . 
C3 C 0.8154(6) 0.6658(6) 0.9224(4) 0.0554(14) Uani 1 1 d . . . 
O3 O 0.8485(5) 0.6039(5) 0.9949(3) 0.0839(14) Uani 1 1 d . . . 
C4 C 0.8526(6) 0.9117(6) 0.7741(5) 0.0604(16) Uani 1 1 d . . . 
O4 O 0.9070(5) 0.9937(5) 0.7601(4) 0.0954(17) Uani 1 1 d . . . 
C5 C 0.8274(6) 0.6576(6) 0.5279(5) 0.0651(17) Uani 1 1 d . . . 
O5 O 0.8932(5) 0.6710(6) 0.4626(4) 0.0991(18) Uani 1 1 d . . . 
C6 C 0.5956(7) 0.6326(6) 0.5536(5) 0.0658(17) Uani 1 1 d . . . 
O6 O 0.5149(6) 0.6352(6) 0.4987(4) 0.0989(17) Uani 1 1 d . . . 
C7 C 0.7797(8) 0.4601(7) 0.6469(5) 0.077(2) Uani 1 1 d . . . 
O7 O 0.8113(7) 0.3500(5) 0.6582(4) 0.116(2) Uani 1 1 d . . . 
C10 C 0.9723(6) 0.5617(7) 0.7516(5) 0.0703(18) Uani 1 1 d . . . 
H10A H 1.0161 0.5223 0.7019 0.105 Uiso 1 1 calc R . . 
H10B H 0.9401 0.4977 0.7966 0.105 Uiso 1 1 calc R . . 
H10C H 1.0329 0.5962 0.7826 0.105 Uiso 1 1 calc R . . 
O10 O 0.8679(4) 0.6611(4) 0.7137(3) 0.0580(10) Uani 1 1 d . . . 
C11 C 0.3746(5) 1.0460(5) 0.7888(4) 0.0485(13) Uani 1 1 d . . . 
H11A H 0.4033 1.0370 0.8544 0.058 Uiso 1 1 calc R . . 
C12 C 0.2330(6) 1.1312(6) 0.7808(5) 0.0708(19) Uani 1 1 d . . . 
H12A H 0.2010 1.1493 0.7160 0.085 Uiso 1 1 calc R . . 
H12B H 0.1747 1.0855 0.8205 0.085 Uiso 1 1 calc R . . 
C13 C 0.2349(9) 1.2573(7) 0.8122(6) 0.103(3) Uani 1 1 d . . . 
H13A H 0.1469 1.3116 0.8059 0.124 Uiso 1 1 calc R . . 
H13B H 0.2608 1.2382 0.8784 0.124 Uiso 1 1 calc R . . 
C14 C 0.3276(9) 1.3314(7) 0.7557(6) 0.098(3) Uani 1 1 d . . . 
H14A H 0.3296 1.4078 0.7813 0.118 Uiso 1 1 calc R . . 
H14B H 0.2962 1.3600 0.6906 0.118 Uiso 1 1 calc R . . 
C15 C 0.4651(8) 1.2475(6) 0.7583(6) 0.087(2) Uani 1 1 d . . . 
H15A H 0.5206 1.2947 0.7170 0.104 Uiso 1 1 calc R . . 
H15B H 0.5010 1.2294 0.8221 0.104 Uiso 1 1 calc R . . 
C16 C 0.4669(6) 1.1205(5) 0.7277(4) 0.0553(15) Uani 1 1 d . . . 
H16A H 0.5556 1.0679 0.7336 0.066 Uiso 1 1 calc R . . 
H16B H 0.4394 1.1378 0.6619 0.066 Uiso 1 1 calc R . . 
C21 C 0.2672(5) 0.8820(5) 0.6779(3) 0.0450(13) Uani 1 1 d . . . 
H21A H 0.1793 0.9183 0.6989 0.054 Uiso 1 1 calc R . . 
C22 C 0.2658(6) 0.7446(6) 0.6638(4) 0.0599(15) Uani 1 1 d . . . 
H22A H 0.2466 0.6926 0.7233 0.072 Uiso 1 1 calc R . . 
H22B H 0.3520 0.7041 0.6443 0.072 Uiso 1 1 calc R . . 
C23 C 0.1627(7) 0.7473(7) 0.5887(5) 0.0710(18) Uani 1 1 d . . . 
H23A H 0.1705 0.6604 0.5768 0.085 Uiso 1 1 calc R . . 
H23B H 0.0754 0.7752 0.6125 0.085 Uiso 1 1 calc R . . 
C24 C 0.1802(7) 0.8389(7) 0.4965(4) 0.0736(19) Uani 1 1 d . . . 
H24A H 0.2632 0.8055 0.4688 0.088 Uiso 1 1 calc R . . 
H24B H 0.1103 0.8432 0.4522 0.088 Uiso 1 1 calc R . . 
C25 C 0.1779(6) 0.9732(7) 0.5134(4) 0.0615(17) Uani 1 1 d . . . 
H25A H 0.0938 1.0081 0.5389 0.074 Uiso 1 1 calc R . . 
H25B H 0.1888 1.0301 0.4539 0.074 Uiso 1 1 calc R . . 
C26 C 0.2876(6) 0.9689(6) 0.5823(4) 0.0572(15) Uani 1 1 d . . . 
H26A H 0.2871 1.0560 0.5913 0.069 Uiso 1 1 calc R . . 
H26B H 0.3720 0.9343 0.5568 0.069 Uiso 1 1 calc R . . 
C31 C 0.3316(5) 0.7807(5) 0.8779(4) 0.0456(13) Uani 1 1 d . . . 
H31A H 0.3289 0.6977 0.8606 0.055 Uiso 1 1 calc R . . 
C32 C 0.4251(5) 0.7470(5) 0.9637(3) 0.0474(13) Uani 1 1 d . . . 
H32A H 0.5134 0.7112 0.9453 0.057 Uiso 1 1 calc R . . 
H32B H 0.4264 0.8249 0.9876 0.057 Uiso 1 1 calc R . . 
C33 C 0.3788(6) 0.6481(6) 1.0406(4) 0.0593(15) Uani 1 1 d . . . 
H33A H 0.3823 0.5688 1.0173 0.071 Uiso 1 1 calc R . . 
H33B H 0.4378 0.6272 1.0951 0.071 Uiso 1 1 calc R . . 
C34 C 0.2416(7) 0.6983(7) 1.0704(4) 0.0730(19) Uani 1 1 d . . . 
H34A H 0.2399 0.7722 1.0998 0.088 Uiso 1 1 calc R . . 
H34B H 0.2142 0.6312 1.1168 0.088 Uiso 1 1 calc R . . 
C35 C 0.1469(6) 0.7384(8) 0.9877(5) 0.079(2) Uani 1 1 d . . . 
H35A H 0.0610 0.7776 1.0085 0.095 Uiso 1 1 calc R . . 
H35B H 0.1389 0.6621 0.9640 0.095 Uiso 1 1 calc R . . 
C36 C 0.1921(6) 0.8356(7) 0.9077(4) 0.0692(18) Uani 1 1 d . . . 
H36A H 0.1324 0.8544 0.8538 0.083 Uiso 1 1 calc R . . 
H36B H 0.1898 0.9162 0.9289 0.083 Uiso 1 1 calc R . . 
  
loop_ 
 _atom_site_aniso_label 
 _atom_site_aniso_U_11 
 _atom_site_aniso_U_22 
 _atom_site_aniso_U_33 
 _atom_site_aniso_U_23 
 _atom_site_aniso_U_13 
 _atom_site_aniso_U_12 
Mo1 0.0336(3) 0.0410(3) 0.0465(3) -0.0033(2) -0.00204(18) -0.00315(19) 
Mn1 0.0559(5) 0.0479(5) 0.0494(5) -0.0114(4) 0.0086(4) -0.0033(4) 
S1 0.0498(8) 0.0322(7) 0.0472(8) -0.0024(6) 0.0016(6) -0.0057(6) 
S2 0.0419(7) 0.0416(7) 0.0423(7) -0.0002(6) 0.0044(5) -0.0079(6) 
C1 0.041(3) 0.033(3) 0.039(3) 0.001(2) -0.001(2) -0.008(2) 
P1 0.0341(7) 0.0394(7) 0.0365(7) 0.0001(6) -0.0009(5) -0.0053(6) 
C2 0.045(3) 0.044(3) 0.058(4) -0.006(3) -0.007(3) -0.007(3) 
O2 0.071(3) 0.062(3) 0.068(3) -0.024(2) -0.004(2) -0.008(2) 
C3 0.051(3) 0.053(4) 0.055(4) -0.007(3) -0.005(3) 0.002(3) 
O3 0.102(4) 0.075(3) 0.059(3) 0.006(2) -0.023(3) 0.000(3) 
C4 0.040(3) 0.061(4) 0.076(4) -0.004(3) -0.006(3) -0.008(3) 
O4 0.071(3) 0.084(4) 0.134(5) 0.003(3) -0.020(3) -0.043(3) 
C5 0.060(4) 0.064(4) 0.064(4) -0.012(3) 0.003(3) 0.001(3) 
O5 0.093(4) 0.130(5) 0.064(3) -0.014(3) 0.030(3) -0.011(3) 
C6 0.080(5) 0.061(4) 0.057(4) -0.017(3) 0.007(3) -0.013(3) 
O6 0.110(4) 0.108(4) 0.085(4) -0.036(3) -0.019(3) -0.019(3) 
C7 0.096(5) 0.063(5) 0.071(4) -0.021(4) 0.014(4) -0.008(4) 
O7 0.168(6) 0.051(3) 0.124(5) -0.034(3) 0.018(4) 0.000(3) 
C10 0.047(3) 0.075(5) 0.078(4) -0.006(4) 0.011(3) 0.002(3) 
O10 0.047(2) 0.056(2) 0.060(2) -0.0053(19) 0.0045(18) 0.0067(18) 
C11 0.054(3) 0.039(3) 0.044(3) -0.003(2) -0.007(2) 0.005(2) 
C12 0.063(4) 0.053(4) 0.075(4) 0.003(3) 0.008(3) 0.017(3) 
C13 0.134(8) 0.058(5) 0.089(6) -0.014(4) 0.001(5) 0.040(5) 
C14 0.137(8) 0.044(4) 0.103(6) -0.016(4) -0.026(6) 0.006(5) 
C15 0.120(6) 0.048(4) 0.093(5) -0.011(4) -0.038(5) -0.016(4) 
C16 0.059(4) 0.037(3) 0.069(4) -0.007(3) -0.014(3) -0.008(3) 
C21 0.035(3) 0.057(3) 0.040(3) 0.001(2) -0.003(2) -0.012(2) 
C22 0.063(4) 0.062(4) 0.056(4) -0.006(3) -0.010(3) -0.021(3) 
C23 0.073(4) 0.071(4) 0.075(4) -0.016(4) -0.014(3) -0.025(4) 
C24 0.058(4) 0.109(6) 0.054(4) -0.018(4) -0.008(3) -0.016(4) 
C25 0.054(4) 0.087(5) 0.041(3) 0.008(3) -0.010(3) -0.029(3) 
C26 0.051(3) 0.073(4) 0.045(3) 0.006(3) -0.009(3) -0.023(3) 
C31 0.041(3) 0.049(3) 0.043(3) 0.000(2) 0.001(2) -0.011(2) 
C32 0.053(3) 0.046(3) 0.040(3) -0.002(2) 0.003(2) -0.011(3) 
C33 0.077(4) 0.054(4) 0.044(3) 0.005(3) -0.006(3) -0.023(3) 
C34 0.083(5) 0.079(5) 0.053(4) 0.003(3) 0.016(3) -0.027(4) 
C35 0.052(4) 0.102(6) 0.075(5) 0.007(4) 0.018(3) -0.021(4) 
C36 0.046(3) 0.088(5) 0.059(4) 0.008(3) 0.010(3) -0.006(3) 
  
_geom_special_details 
; 
 All esds (except the esd in the dihedral angle between two l.s. planes) 
 are estimated using the full covariance matrix.  The cell esds are taken 
 into account individually in the estimation of esds in distances, angles 
 and torsion angles; correlations between esds in cell parameters are only 
 used when they are defined by crystal symmetry.  An approximate (isotropic) 
 treatment of cell esds is used for estimating esds involving l.s. planes. 
; 
  
loop_ 
 _geom_bond_atom_site_label_1 
 _geom_bond_atom_site_label_2 
 _geom_bond_distance 
 _geom_bond_site_symmetry_2 
 _geom_bond_publ_flag 
Mo1 C2 1.943(6) . ? 
Mo1 C3 2.012(6) . ? 
Mo1 C4 2.015(7) . ? 
Mo1 O10 2.142(4) . ? 
Mo1 C1 2.148(5) . ? 
Mo1 S2 2.5113(14) . ? 
Mo1 S1 2.5333(14) . ? 
Mo1 Mn1 3.1489(10) . ? 
Mn1 C6 1.774(8) . ? 
Mn1 C5 1.800(7) . ? 
Mn1 C7 1.808(8) . ? 
Mn1 O10 2.042(4) . ? 
Mn1 S2 2.4278(16) . ? 
Mn1 S1 2.4349(16) . ? 
S1 C1 1.779(5) . ? 
S2 C1 1.772(5) . ? 
C1 P1 1.806(5) . ? 
P1 C11 1.827(5) . ? 
P1 C21 1.828(5) . ? 
P1 C31 1.833(5) . ? 
C2 O2 1.174(7) . ? 
C3 O3 1.140(7) . ? 
C4 O4 1.134(7) . ? 
C5 O5 1.156(7) . ? 
C6 O6 1.164(8) . ? 
C7 O7 1.138(8) . ? 
C10 O10 1.385(7) . ? 
C11 C16 1.536(8) . ? 
C11 C12 1.553(7) . ? 
C12 C13 1.517(10) . ? 
C13 C14 1.507(12) . ? 
C14 C15 1.515(11) . ? 
C15 C16 1.513(8) . ? 
C21 C22 1.535(8) . ? 
C21 C26 1.544(7) . ? 
C22 C23 1.538(8) . ? 
C23 C24 1.524(9) . ? 
C24 C25 1.507(9) . ? 
C25 C26 1.522(7) . ? 
C31 C36 1.531(7) . ? 
C31 C32 1.531(7) . ? 
C32 C33 1.525(7) . ? 
C33 C34 1.499(9) . ? 
C34 C35 1.501(9) . ? 
C35 C36 1.535(8) . ? 
  
loop_ 
 _geom_angle_atom_site_label_1 
 _geom_angle_atom_site_label_2 
 _geom_angle_atom_site_label_3 
 _geom_angle 
 _geom_angle_site_symmetry_1 
 _geom_angle_site_symmetry_3 
 _geom_angle_publ_flag 
C2 Mo1 C3 78.2(2) . . ? 
C2 Mo1 C4 79.0(2) . . ? 
C3 Mo1 C4 102.7(2) . . ? 
C2 Mo1 O10 165.84(19) . . ? 
C3 Mo1 O10 94.57(19) . . ? 
C4 Mo1 O10 90.9(2) . . ? 
C2 Mo1 C1 88.3(2) . . ? 
C3 Mo1 C1 126.0(2) . . ? 
C4 Mo1 C1 125.7(2) . . ? 
O10 Mo1 C1 105.73(17) . . ? 
C2 Mo1 S2 111.21(16) . . ? 
C3 Mo1 S2 163.32(18) . . ? 
C4 Mo1 S2 92.77(18) . . ? 
O10 Mo1 S2 78.91(11) . . ? 
C1 Mo1 S2 43.85(13) . . ? 
C2 Mo1 S1 112.06(17) . . ? 
C3 Mo1 S1 94.21(18) . . ? 
C4 Mo1 S1 161.53(18) . . ? 
O10 Mo1 S1 80.35(12) . . ? 
C1 Mo1 S1 43.72(13) . . ? 
S2 Mo1 S1 69.68(4) . . ? 
C2 Mo1 Mn1 154.02(16) . . ? 
C3 Mo1 Mn1 116.98(17) . . ? 
C4 Mo1 Mn1 114.83(19) . . ? 
O10 Mo1 Mn1 40.01(11) . . ? 
C1 Mo1 Mn1 65.74(13) . . ? 
S2 Mo1 Mn1 49.23(4) . . ? 
S1 Mo1 Mn1 49.30(4) . . ? 
C6 Mn1 C5 88.8(3) . . ? 
C6 Mn1 C7 91.0(3) . . ? 
C5 Mn1 C7 91.6(3) . . ? 
C6 Mn1 O10 173.0(2) . . ? 
C5 Mn1 O10 90.5(2) . . ? 
C7 Mn1 O10 95.9(3) . . ? 
C6 Mn1 S2 90.5(2) . . ? 
C5 Mn1 S2 101.2(2) . . ? 
C7 Mn1 S2 167.2(2) . . ? 
O10 Mn1 S2 82.82(11) . . ? 
C6 Mn1 S1 95.3(2) . . ? 
C5 Mn1 S1 172.6(2) . . ? 
C7 Mn1 S1 94.5(2) . . ? 
O10 Mn1 S1 84.74(11) . . ? 
S2 Mn1 S1 72.69(5) . . ? 
C6 Mn1 Mo1 133.3(2) . . ? 
C5 Mn1 Mo1 121.0(2) . . ? 
C7 Mn1 Mo1 120.1(2) . . ? 
O10 Mn1 Mo1 42.40(10) . . ? 
S2 Mn1 Mo1 51.57(4) . . ? 
S1 Mn1 Mo1 52.07(4) . . ? 
C1 S1 Mn1 89.18(17) . . ? 
C1 S1 Mo1 56.55(16) . . ? 
Mn1 S1 Mo1 78.64(5) . . ? 
C1 S2 Mn1 89.58(17) . . ? 
C1 S2 Mo1 57.12(16) . . ? 
Mn1 S2 Mo1 79.20(4) . . ? 
S2 C1 S1 108.5(3) . . ? 
S2 C1 P1 122.7(3) . . ? 
S1 C1 P1 119.3(3) . . ? 
S2 C1 Mo1 79.04(19) . . ? 
S1 C1 Mo1 79.73(18) . . ? 
P1 C1 Mo1 136.6(3) . . ? 
C1 P1 C11 112.1(2) . . ? 
C1 P1 C21 109.9(2) . . ? 
C11 P1 C21 110.4(2) . . ? 
C1 P1 C31 107.7(2) . . ? 
C11 P1 C31 110.9(3) . . ? 
C21 P1 C31 105.6(2) . . ? 
O2 C2 Mo1 172.2(5) . . ? 
O3 C3 Mo1 175.3(5) . . ? 
O4 C4 Mo1 175.2(5) . . ? 
O5 C5 Mn1 179.4(6) . . ? 
O6 C6 Mn1 175.5(6) . . ? 
O7 C7 Mn1 178.6(8) . . ? 
C10 O10 Mn1 122.6(4) . . ? 
C10 O10 Mo1 122.7(4) . . ? 
Mn1 O10 Mo1 97.59(15) . . ? 
C16 C11 C12 109.6(5) . . ? 
C16 C11 P1 115.8(4) . . ? 
C12 C11 P1 113.4(4) . . ? 
C13 C12 C11 108.8(6) . . ? 
C14 C13 C12 112.9(7) . . ? 
C13 C14 C15 111.0(6) . . ? 
C16 C15 C14 112.1(6) . . ? 
C15 C16 C11 110.6(6) . . ? 
C22 C21 C26 110.0(5) . . ? 
C22 C21 P1 112.3(4) . . ? 
C26 C21 P1 114.1(4) . . ? 
C21 C22 C23 111.4(5) . . ? 
C24 C23 C22 111.4(5) . . ? 
C25 C24 C23 110.9(5) . . ? 
C24 C25 C26 110.3(5) . . ? 
C25 C26 C21 109.3(4) . . ? 
C36 C31 C32 109.5(5) . . ? 
C36 C31 P1 113.0(4) . . ? 
C32 C31 P1 116.1(4) . . ? 
C33 C32 C31 109.3(4) . . ? 
C34 C33 C32 111.8(5) . . ? 
C33 C34 C35 111.6(5) . . ? 
C34 C35 C36 111.7(6) . . ? 
C31 C36 C35 110.7(5) . . ? 
  
_diffrn_measured_fraction_theta_max    0.973 
_diffrn_reflns_theta_full              23.30 
_diffrn_measured_fraction_theta_full   0.973 
_refine_diff_density_max    0.614 
_refine_diff_density_min   -0.529 
_refine_diff_density_rms    0.076 

#===END

data_Compound_3e_(aminoa) 
  
_audit_creation_method            SHELXL-97 
_chemical_name_systematic 
; 
 ? 
; 
_chemical_name_common             ? 
_chemical_melting_point           ? 
_chemical_formula_moiety          
 'C28 H41 Mn Mo N O7 P S2 . 0.25(CH2Cl2)'  
_chemical_formula_sum 
 'C28.25 H41.50 Cl0.50 Mn Mo N O7 P S2' 
_chemical_formula_weight          770.82 
  
loop_ 
 _atom_type_symbol 
 _atom_type_description 
 _atom_type_scat_dispersion_real 
 _atom_type_scat_dispersion_imag 
 _atom_type_scat_source 
 'C'  'C'   0.0033   0.0016 
 'International Tables Vol C Tables 4.2.6.8 and 6.1.1.4' 
 'H'  'H'   0.0000   0.0000 
 'International Tables Vol C Tables 4.2.6.8 and 6.1.1.4' 
 'N'  'N'   0.0061   0.0033 
 'International Tables Vol C Tables 4.2.6.8 and 6.1.1.4' 
 'O'  'O'   0.0106   0.0060 
 'International Tables Vol C Tables 4.2.6.8 and 6.1.1.4' 
 'P'  'P'   0.1023   0.0942 
 'International Tables Vol C Tables 4.2.6.8 and 6.1.1.4' 
 'S'  'S'   0.1246   0.1234 
 'International Tables Vol C Tables 4.2.6.8 and 6.1.1.4' 
 'Mn'  'Mn'   0.3368   0.7283 
 'International Tables Vol C Tables 4.2.6.8 and 6.1.1.4' 
 'Mo'  'Mo'  -1.6832   0.6857 
 'International Tables Vol C Tables 4.2.6.8 and 6.1.1.4' 
 'Cl'  'Cl'   0.1484   0.1585 
 'International Tables Vol C Tables 4.2.6.8 and 6.1.1.4' 
  
_symmetry_cell_setting            Monoclinic 
_symmetry_space_group_name_H-M    P2(1)/c 
  
loop_ 
 _symmetry_equiv_pos_as_xyz 
 'x, y, z' 
 '-x, y+1/2, -z+1/2' 
 '-x, -y, -z' 
 'x, -y-1/2, z-1/2' 
  
_cell_length_a                    15.505(4) 
_cell_length_b                    20.234(5) 
_cell_length_c                    11.910(3) 
_cell_angle_alpha                 90.00 
_cell_angle_beta                  102.186(4) 
_cell_angle_gamma                 90.00 
_cell_volume                      3652.3(17) 
_cell_formula_units_Z             4 
_cell_measurement_temperature     296(2) 
_cell_measurement_reflns_used     ? 
_cell_measurement_theta_min       ? 
_cell_measurement_theta_max       ? 
  
_exptl_crystal_description        needle 
_exptl_crystal_colour             'green brown' 
_exptl_crystal_size_max           0.2 
_exptl_crystal_size_mid           0.04 
_exptl_crystal_size_min           0.02 
_exptl_crystal_density_meas       ? 
_exptl_crystal_density_diffrn     1.402 
_exptl_crystal_density_method     'not measured' 
_exptl_crystal_F_000              1586 
_exptl_absorpt_coefficient_mu     0.923 
_exptl_absorpt_correction_type    SADABS 
_exptl_absorpt_correction_T_min   0.708291 
_exptl_absorpt_correction_T_max   1.000000 
_exptl_absorpt_process_details    ? 
  
_exptl_special_details 
; 
 ? 
; 
  
_diffrn_ambient_temperature       296(2) 
_diffrn_radiation_wavelength      0.71073 
_diffrn_radiation_type            MoK\a 
_diffrn_radiation_source          'fine-focus sealed tube' 
_diffrn_radiation_monochromator   graphite 
_diffrn_measurement_device_type   'CCD area detector' 
_diffrn_measurement_method        'phi and omega scans' 
_diffrn_detector_area_resol_mean  ? 
_diffrn_standards_number          ? 
_diffrn_standards_interval_count  ? 
_diffrn_standards_interval_time   ? 
_diffrn_standards_decay_%         ? 
_diffrn_reflns_number             15951 
_diffrn_reflns_av_R_equivalents   0.0826 
_diffrn_reflns_av_sigmaI/netI     0.0965 
_diffrn_reflns_limit_h_min        -16 
_diffrn_reflns_limit_h_max        17 
_diffrn_reflns_limit_k_min        -22 
_diffrn_reflns_limit_k_max        19 
_diffrn_reflns_limit_l_min        -13 
_diffrn_reflns_limit_l_max        13 
_diffrn_reflns_theta_min          1.34 
_diffrn_reflns_theta_max          23.36 
_reflns_number_total              5274 
_reflns_number_gt                 1779 
_reflns_threshold_expression      >2sigma(I) 
  
_computing_data_collection        'Bruker SMART' 
_computing_cell_refinement        'Bruker SMART' 
_computing_data_reduction         'Bruker SHELXTL' 
_computing_structure_solution     'SHELXS-97 (Sheldrick, 1990)' 
_computing_structure_refinement   'SHELXL-97 (Sheldrick, 1997)' 
_computing_molecular_graphics     'Bruker SHELXTL' 
_computing_publication_material   'Bruker SHELXTL' 
  
_refine_special_details 
; 
 Refinement of F^2^ against ALL reflections.  The weighted R-factor wR and 
 goodness of fit S are based on F^2^, conventional R-factors R are based 
 on F, with F set to zero for negative F^2^. The threshold expression of 
 F^2^ > 2sigma(F^2^) is used only for calculating R-factors(gt) etc. and is 
 not relevant to the choice of reflections for refinement.  R-factors based 
 on F^2^ are statistically about twice as large as those based on F, and R- 
 factors based on ALL data will be even larger. 
; 
  
_refine_ls_structure_factor_coef  Fsqd 
_refine_ls_matrix_type            full 
_refine_ls_weighting_scheme       calc 
_refine_ls_weighting_details 
 'calc w=1/[\s^2^(Fo^2^)+(0.0002P)^2^+0.0000P] where P=(Fo^2^+2Fc^2^)/3' 
_atom_sites_solution_primary      direct 
_atom_sites_solution_secondary    difmap 
_atom_sites_solution_hydrogens    geom 
_refine_ls_hydrogen_treatment     mixed 
_refine_ls_extinction_method      none 
_refine_ls_extinction_coef        ? 
_refine_ls_number_reflns          5274 
_refine_ls_number_parameters      396 
_refine_ls_number_restraints      3 
_refine_ls_R_factor_all           0.1043 
_refine_ls_R_factor_gt            0.0601 
_refine_ls_wR_factor_ref          0.1062 
_refine_ls_wR_factor_gt           0.0893 
_refine_ls_goodness_of_fit_ref    0.805 
_refine_ls_restrained_S_all       0.805 
_refine_ls_shift/su_max           0.361 
_refine_ls_shift/su_mean          0.047 
  
loop_ 
 _atom_site_label 
 _atom_site_type_symbol 
 _atom_site_fract_x 
 _atom_site_fract_y 
 _atom_site_fract_z 
 _atom_site_U_iso_or_equiv 
 _atom_site_adp_type 
 _atom_site_occupancy 
 _atom_site_symmetry_multiplicity 
 _atom_site_calc_flag 
 _atom_site_refinement_flags 
 _atom_site_disorder_assembly 
 _atom_site_disorder_group 
Mn1 Mn 0.28774(12) 1.05186(9) 0.76094(15) 0.0459(6) Uani 1 1 d . . . 
Mo1 Mo 0.20650(7) 1.09767(5) 0.50264(9) 0.0417(3) Uani 1 1 d . . . 
S1 S 0.1818(2) 0.99707(14) 0.6104(3) 0.0469(9) Uani 1 1 d . . . 
S2 S 0.3555(2) 1.04426(15) 0.5943(2) 0.0433(9) Uani 1 1 d . . . 
N1 N 0.2586(6) 1.1979(4) 0.5016(7) 0.054(3) Uani 1 1 d . . . 
H1A H 0.3177 1.1957 0.5111 0.065 Uiso 1 1 calc R . . 
H1B H 0.2373 1.2161 0.4324 0.065 Uiso 1 1 calc R . . 
O1 O 0.2243(4) 1.1367(4) 0.6780(5) 0.039(2) Uani 1 1 d . . . 
C1 C 0.2564(7) 1.0009(5) 0.5217(9) 0.049(4) Uani 1 1 d . . . 
C2 C 0.1886(7) 1.0908(5) 0.3368(10) 0.048(3) Uani 1 1 d . . . 
O2 O 0.1713(6) 1.0915(4) 0.2361(7) 0.074(3) Uani 1 1 d . . . 
C3 C 0.0806(8) 1.1143(5) 0.4438(10) 0.041(3) Uani 1 1 d . . . 
O3 O 0.0064(6) 1.1206(5) 0.4034(8) 0.089(4) Uani 1 1 d . . . 
C4 C 0.2204(9) 1.0534(6) 0.8709(11) 0.063(4) Uani 1 1 d . . . 
O4 O 0.1859(6) 1.0514(5) 0.9459(7) 0.097(4) Uani 1 1 d . . . 
C5 C 0.3702(8) 1.1002(7) 0.8495(11) 0.058(4) Uani 1 1 d . . . 
O5 O 0.4264(6) 1.1280(4) 0.9151(8) 0.080(3) Uani 1 1 d . . . 
C6 C 0.3369(9) 0.9780(6) 0.8131(11) 0.056(4) Uani 1 1 d . . . 
O6 O 0.3748(6) 0.9292(4) 0.8479(7) 0.080(3) Uani 1 1 d . . . 
O10 O 0.2564(6) 1.2218(4) 0.7955(7) 0.068(3) Uani 1 1 d . . . 
P1 P 0.2648(2) 0.93263(15) 0.4246(3) 0.0411(9) Uani 1 1 d . . . 
C11 C 0.2409(8) 1.1987(6) 0.6970(11) 0.046(4) Uani 1 1 d . . . 
C12 C 0.2369(9) 1.2415(6) 0.5910(11) 0.053(4) Uani 1 1 d . . . 
C13 C 0.3061(8) 1.2925(5) 0.6226(10) 0.077(4) Uani 1 1 d . . . 
H13A H 0.3631 1.2724 0.6307 0.116 Uiso 1 1 calc R . . 
H13B H 0.3012 1.3126 0.6940 0.116 Uiso 1 1 calc R . . 
H13C H 0.2987 1.3256 0.5636 0.116 Uiso 1 1 calc R . . 
C14 C 0.1430(7) 1.2711(5) 0.5551(10) 0.064(4) Uani 1 1 d . . . 
H14A H 0.1382 1.2953 0.4848 0.097 Uiso 1 1 calc R . . 
H14B H 0.1323 1.3003 0.6143 0.097 Uiso 1 1 calc R . . 
H14C H 0.1002 1.2361 0.5442 0.097 Uiso 1 1 calc R . . 
C21 C 0.1506(7) 0.8997(7) 0.3771(10) 0.050(3) Uani 1 1 d . . . 
H21 H 0.1283 0.8952 0.4479 0.060 Uiso 1 1 calc R . . 
C22 C 0.1435(8) 0.8307(7) 0.3251(13) 0.087(5) Uani 1 1 d . . . 
H22A H 0.1627 0.8328 0.2527 0.105 Uiso 1 1 calc R . . 
H22B H 0.1842 0.8020 0.3759 0.105 Uiso 1 1 calc R . . 
C23 C 0.0568(10) 0.8007(7) 0.3044(15) 0.103(6) Uani 1 1 d . . . 
H23A H 0.0401 0.7913 0.3767 0.124 Uiso 1 1 calc R . . 
H23B H 0.0571 0.7596 0.2627 0.124 Uiso 1 1 calc R . . 
C24 C -0.0073(10) 0.8479(9) 0.2355(14) 0.103(6) Uani 1 1 d . . . 
H24A H 0.0030 0.8496 0.1580 0.123 Uiso 1 1 calc R . . 
H24B H -0.0665 0.8312 0.2310 0.123 Uiso 1 1 calc R . . 
C25 C -0.0021(8) 0.9158(7) 0.2825(12) 0.088(5) Uani 1 1 d . . . 
H25A H -0.0410 0.9443 0.2288 0.105 Uiso 1 1 calc R . . 
H25B H -0.0227 0.9157 0.3539 0.105 Uiso 1 1 calc R . . 
C26 C 0.0874(9) 0.9429(6) 0.3036(11) 0.072(4) Uani 1 1 d . . . 
H26A H 0.0879 0.9859 0.3398 0.087 Uiso 1 1 calc R . . 
H26B H 0.1051 0.9489 0.2309 0.087 Uiso 1 1 calc R . . 
C31 C 0.3294(7) 0.8662(5) 0.4954(10) 0.051(4) Uani 1 1 d . . . 
H31 H 0.3258 0.8308 0.4384 0.061 Uiso 1 1 calc R . . 
C32 C 0.4292(8) 0.8815(5) 0.5387(10) 0.059(4) Uani 1 1 d . . . 
H32A H 0.4360 0.9143 0.5992 0.071 Uiso 1 1 calc R . . 
H32B H 0.4524 0.9001 0.4760 0.071 Uiso 1 1 calc R . . 
C33 C 0.4838(9) 0.8189(6) 0.5852(12) 0.080(5) Uani 1 1 d . . . 
H33A H 0.4824 0.7874 0.5233 0.096 Uiso 1 1 calc R . . 
H33B H 0.5448 0.8311 0.6154 0.096 Uiso 1 1 calc R . . 
C34 C 0.4449(11) 0.7874(6) 0.6800(13) 0.108(6) Uani 1 1 d . . . 
H34A H 0.4551 0.8162 0.7466 0.129 Uiso 1 1 calc R . . 
H34B H 0.4742 0.7457 0.7026 0.129 Uiso 1 1 calc R . . 
C35 C 0.3429(10) 0.7752(7) 0.6384(14) 0.100(6) Uani 1 1 d . . . 
H35A H 0.3334 0.7425 0.5774 0.120 Uiso 1 1 calc R . . 
H35B H 0.3197 0.7573 0.7016 0.120 Uiso 1 1 calc R . . 
C36 C 0.2929(9) 0.8371(6) 0.5953(11) 0.078(5) Uani 1 1 d . . . 
H36A H 0.2991 0.8692 0.6571 0.094 Uiso 1 1 calc R . . 
H36B H 0.2308 0.8271 0.5695 0.094 Uiso 1 1 calc R . . 
C41 C 0.3042(7) 0.9593(5) 0.2984(8) 0.041(3) Uani 1 1 d . . . 
H41 H 0.2530 0.9784 0.2458 0.049 Uiso 1 1 calc R . . 
C42 C 0.3758(7) 1.0138(5) 0.3186(9) 0.048(3) Uani 1 1 d . . . 
H42A H 0.3557 1.0511 0.3572 0.058 Uiso 1 1 calc R . . 
H42B H 0.4293 0.9968 0.3674 0.058 Uiso 1 1 calc R . . 
C43 C 0.3948(7) 1.0357(5) 0.2073(9) 0.049(3) Uani 1 1 d . . . 
H43A H 0.4406 1.0692 0.2218 0.059 Uiso 1 1 calc R . . 
H43B H 0.3422 1.0557 0.1614 0.059 Uiso 1 1 calc R . . 
C44 C 0.4243(8) 0.9796(6) 0.1397(9) 0.058(4) Uani 1 1 d . . . 
H44A H 0.4807 0.9628 0.1810 0.069 Uiso 1 1 calc R . . 
H44B H 0.4319 0.9960 0.0659 0.069 Uiso 1 1 calc R . . 
C45 C 0.3569(8) 0.9241(5) 0.1212(10) 0.068(4) Uani 1 1 d . . . 
H45A H 0.3798 0.8873 0.0841 0.081 Uiso 1 1 calc R . . 
H45B H 0.3033 0.9393 0.0704 0.081 Uiso 1 1 calc R . . 
C46 C 0.3352(8) 0.9004(6) 0.2334(9) 0.063(4) Uani 1 1 d . . . 
H46A H 0.3870 0.8804 0.2811 0.075 Uiso 1 1 calc R . . 
H46B H 0.2890 0.8673 0.2174 0.075 Uiso 1 1 calc R . . 
Cl91 Cl 0.0376(19) 0.9358(15) 0.955(3) 0.312(18) Uani 0.25 1 d PGD . . 
Cl92 Cl 0.1632(17) 0.8487(13) 0.894(4) 0.45(3) Uani 0.25 1 d PGD . . 
C90 C 0.060(4) 0.887(4) 0.842(4) 0.67(14) Uani 0.25 1 d PGD . . 
H90A H 0.0631 0.9147 0.7757 0.803 Uiso 0.25 1 calc PR . . 
H90B H 0.0146 0.8542 0.8185 0.803 Uiso 0.25 1 calc PR . . 
  
loop_ 
 _atom_site_aniso_label 
 _atom_site_aniso_U_11 
 _atom_site_aniso_U_22 
 _atom_site_aniso_U_33 
 _atom_site_aniso_U_23 
 _atom_site_aniso_U_13 
 _atom_site_aniso_U_12 
Mn1 0.0508(15) 0.0578(15) 0.0292(12) 0.0006(10) 0.0084(11) 0.0029(11) 
Mo1 0.0470(8) 0.0483(7) 0.0295(7) -0.0026(6) 0.0074(6) 0.0014(6) 
S1 0.047(2) 0.055(2) 0.042(2) -0.0020(17) 0.0158(19) -0.0055(17) 
S2 0.041(2) 0.056(2) 0.033(2) -0.0062(17) 0.0074(18) -0.0024(17) 
N1 0.074(9) 0.069(8) 0.016(6) -0.005(5) 0.003(6) 0.003(6) 
O1 0.047(6) 0.049(6) 0.024(5) -0.002(4) 0.016(4) 0.008(4) 
C1 0.058(10) 0.074(10) 0.018(7) -0.015(7) 0.017(7) -0.027(7) 
C2 0.044(9) 0.045(8) 0.054(10) -0.009(8) 0.003(8) -0.005(6) 
O2 0.112(8) 0.096(7) 0.016(5) 0.001(5) 0.019(6) -0.004(6) 
C3 0.045(10) 0.042(9) 0.040(9) 0.004(6) 0.015(8) 0.005(7) 
O3 0.033(7) 0.146(10) 0.081(8) -0.016(6) -0.003(6) 0.020(6) 
C4 0.080(13) 0.066(10) 0.037(10) 0.007(8) -0.004(8) -0.009(8) 
O4 0.103(9) 0.153(9) 0.047(7) 0.009(6) 0.040(7) 0.013(7) 
C5 0.035(10) 0.080(11) 0.055(10) 0.011(9) 0.001(8) 0.012(8) 
O5 0.064(8) 0.080(8) 0.088(9) -0.019(6) -0.004(7) 0.004(5) 
C6 0.076(12) 0.058(11) 0.044(10) -0.014(8) 0.037(9) 0.006(8) 
O6 0.127(10) 0.059(8) 0.055(7) 0.003(5) 0.020(6) 0.026(6) 
O10 0.111(9) 0.058(7) 0.033(6) -0.010(5) 0.010(6) -0.001(5) 
P1 0.045(3) 0.044(2) 0.034(2) -0.0041(17) 0.0101(19) -0.0016(17) 
C11 0.073(11) 0.021(8) 0.042(10) 0.003(7) 0.007(8) 0.012(7) 
C12 0.098(13) 0.018(8) 0.050(10) -0.014(7) 0.029(9) -0.033(8) 
C13 0.105(13) 0.066(11) 0.064(11) 0.011(8) 0.028(10) 0.021(9) 
C14 0.069(11) 0.054(9) 0.068(11) -0.005(7) 0.011(9) 0.025(8) 
C21 0.033(9) 0.078(10) 0.040(9) -0.020(8) 0.009(7) -0.010(8) 
C22 0.052(12) 0.092(13) 0.113(14) -0.017(10) 0.007(10) -0.021(9) 
C23 0.059(15) 0.107(16) 0.133(17) -0.032(12) -0.004(12) -0.029(11) 
C24 0.065(14) 0.163(19) 0.081(15) -0.034(13) 0.020(12) -0.050(12) 
C25 0.050(12) 0.124(15) 0.074(12) -0.024(10) -0.021(9) -0.005(10) 
C26 0.044(11) 0.100(12) 0.063(11) -0.002(9) -0.012(9) -0.019(9) 
C31 0.040(10) 0.059(9) 0.057(10) -0.017(7) 0.016(8) -0.005(7) 
C32 0.079(12) 0.057(10) 0.033(9) 0.016(7) -0.006(8) 0.011(8) 
C33 0.092(13) 0.069(12) 0.073(12) -0.023(9) 0.001(10) 0.013(9) 
C34 0.19(2) 0.050(11) 0.083(14) 0.045(9) 0.027(15) 0.033(11) 
C35 0.104(16) 0.111(15) 0.097(15) 0.027(11) 0.045(13) -0.003(12) 
C36 0.131(15) 0.048(10) 0.058(11) 0.026(8) 0.023(10) 0.003(9) 
C41 0.056(9) 0.042(8) 0.029(8) -0.003(6) 0.022(7) -0.003(7) 
C42 0.051(10) 0.057(9) 0.038(9) 0.001(7) 0.015(7) -0.002(7) 
C43 0.043(9) 0.062(10) 0.035(8) -0.009(7) -0.008(7) 0.000(7) 
C44 0.077(11) 0.066(10) 0.031(8) -0.002(7) 0.013(8) 0.006(8) 
C45 0.100(13) 0.054(11) 0.052(11) -0.016(7) 0.022(9) 0.000(8) 
C46 0.084(11) 0.069(10) 0.042(9) 0.001(8) 0.028(8) 0.010(8) 
Cl91 0.20(4) 0.39(5) 0.32(4) 0.14(4) 0.00(3) -0.11(3) 
Cl92 0.24(4) 0.21(3) 0.75(9) -0.18(4) -0.21(4) -0.08(3) 
C90 0.13(10) 0.37(14) 1.6(4) -0.5(2) 0.42(19) -0.04(9) 
  
_geom_special_details 
; 
 All esds (except the esd in the dihedral angle between two l.s. planes) 
 are estimated using the full covariance matrix.  The cell esds are taken 
 into account individually in the estimation of esds in distances, angles 
 and torsion angles; correlations between esds in cell parameters are only 
 used when they are defined by crystal symmetry.  An approximate (isotropic) 
 treatment of cell esds is used for estimating esds involving l.s. planes. 
; 
  
loop_ 
 _geom_bond_atom_site_label_1 
 _geom_bond_atom_site_label_2 
 _geom_bond_distance 
 _geom_bond_site_symmetry_2 
 _geom_bond_publ_flag 
Mn1 C6 1.732(14) . ? 
Mn1 C5 1.771(14) . ? 
Mn1 C4 1.840(12) . ? 
Mn1 O1 2.117(7) . ? 
Mn1 S1 2.428(4) . ? 
Mn1 S2 2.439(3) . ? 
Mn1 Mo1 3.205(2) . ? 
Mo1 C2 1.941(12) . ? 
Mo1 C3 1.959(12) . ? 
Mo1 C1 2.100(11) . ? 
Mo1 N1 2.184(8) . ? 
Mo1 O1 2.195(7) . ? 
Mo1 S1 2.479(3) . ? 
Mo1 S2 2.576(3) . ? 
S1 C1 1.725(9) . ? 
S2 C1 1.821(10) . ? 
N1 C12 1.475(12) . ? 
O1 C11 1.292(11) . ? 
C1 P1 1.824(10) . ? 
C2 O2 1.172(11) . ? 
C3 O3 1.156(12) . ? 
C4 O4 1.134(11) . ? 
C5 O5 1.182(13) . ? 
C6 O6 1.179(12) . ? 
O10 C11 1.238(12) . ? 
P1 C31 1.778(11) . ? 
P1 C41 1.820(9) . ? 
P1 C21 1.865(11) . ? 
C11 C12 1.520(15) . ? 
C12 C13 1.479(14) . ? 
C12 C14 1.549(15) . ? 
C21 C26 1.459(14) . ? 
C21 C22 1.521(14) . ? 
C22 C23 1.448(15) . ? 
C23 C24 1.492(18) . ? 
C24 C25 1.479(16) . ? 
C25 C26 1.463(14) . ? 
C31 C36 1.538(13) . ? 
C31 C32 1.556(14) . ? 
C32 C33 1.559(14) . ? 
C33 C34 1.528(15) . ? 
C34 C35 1.573(17) . ? 
C35 C36 1.506(15) . ? 
C41 C42 1.546(12) . ? 
C41 C46 1.552(12) . ? 
C42 C43 1.485(12) . ? 
C43 C44 1.517(12) . ? 
C44 C45 1.518(13) . ? 
C45 C46 1.522(12) . ? 
Cl91 C90 1.7629 . ? 
Cl92 C90 1.7667 . ? 
  
loop_ 
 _geom_angle_atom_site_label_1 
 _geom_angle_atom_site_label_2 
 _geom_angle_atom_site_label_3 
 _geom_angle 
 _geom_angle_site_symmetry_1 
 _geom_angle_site_symmetry_3 
 _geom_angle_publ_flag 
C6 Mn1 C5 93.2(6) . . ? 
C6 Mn1 C4 91.9(5) . . ? 
C5 Mn1 C4 90.8(6) . . ? 
C6 Mn1 O1 173.2(5) . . ? 
C5 Mn1 O1 92.0(5) . . ? 
C4 Mn1 O1 92.3(4) . . ? 
C6 Mn1 S1 92.8(5) . . ? 
C5 Mn1 S1 169.4(4) . . ? 
C4 Mn1 S1 97.9(4) . . ? 
O1 Mn1 S1 81.4(2) . . ? 
C6 Mn1 S2 90.3(4) . . ? 
C5 Mn1 S2 98.0(4) . . ? 
C4 Mn1 S2 170.9(4) . . ? 
O1 Mn1 S2 84.76(18) . . ? 
S1 Mn1 S2 73.18(11) . . ? 
C6 Mn1 Mo1 130.4(4) . . ? 
C5 Mn1 Mo1 120.0(4) . . ? 
C4 Mn1 Mo1 120.7(4) . . ? 
O1 Mn1 Mo1 42.92(18) . . ? 
S1 Mn1 Mo1 49.90(8) . . ? 
S2 Mn1 Mo1 52.17(8) . . ? 
C2 Mo1 C3 74.4(4) . . ? 
C2 Mo1 C1 90.8(4) . . ? 
C3 Mo1 C1 121.1(4) . . ? 
C2 Mo1 N1 92.0(4) . . ? 
C3 Mo1 N1 100.4(4) . . ? 
C1 Mo1 N1 137.6(3) . . ? 
C2 Mo1 O1 163.0(4) . . ? 
C3 Mo1 O1 101.2(4) . . ? 
C1 Mo1 O1 105.3(3) . . ? 
N1 Mo1 O1 72.5(3) . . ? 
C2 Mo1 S1 117.6(3) . . ? 
C3 Mo1 S1 94.3(3) . . ? 
C1 Mo1 S1 43.3(2) . . ? 
N1 Mo1 S1 149.7(2) . . ? 
O1 Mo1 S1 78.8(2) . . ? 
C2 Mo1 S2 108.9(3) . . ? 
C3 Mo1 S2 163.9(3) . . ? 
C1 Mo1 S2 44.4(3) . . ? 
N1 Mo1 S2 95.3(2) . . ? 
O1 Mo1 S2 79.99(19) . . ? 
S1 Mo1 S2 70.03(10) . . ? 
C2 Mo1 Mn1 154.0(3) . . ? 
C3 Mo1 Mn1 123.6(3) . . ? 
C1 Mo1 Mn1 64.2(3) . . ? 
N1 Mo1 Mn1 101.7(2) . . ? 
O1 Mo1 Mn1 41.05(19) . . ? 
S1 Mo1 Mn1 48.54(8) . . ? 
S2 Mo1 Mn1 48.41(7) . . ? 
C1 S1 Mn1 89.7(4) . . ? 
C1 S1 Mo1 56.6(4) . . ? 
Mn1 S1 Mo1 81.56(10) . . ? 
C1 S2 Mn1 87.2(3) . . ? 
C1 S2 Mo1 53.8(4) . . ? 
Mn1 S2 Mo1 79.42(10) . . ? 
C12 N1 Mo1 114.2(6) . . ? 
C11 O1 Mn1 130.6(7) . . ? 
C11 O1 Mo1 119.8(7) . . ? 
Mn1 O1 Mo1 96.0(3) . . ? 
S1 C1 S2 109.8(5) . . ? 
S1 C1 P1 120.1(6) . . ? 
S2 C1 P1 120.0(6) . . ? 
S1 C1 Mo1 80.1(4) . . ? 
S2 C1 Mo1 81.8(4) . . ? 
P1 C1 Mo1 135.4(6) . . ? 
O2 C2 Mo1 173.1(11) . . ? 
O3 C3 Mo1 175.1(11) . . ? 
O4 C4 Mn1 173.0(13) . . ? 
O5 C5 Mn1 174.3(13) . . ? 
O6 C6 Mn1 176.3(13) . . ? 
C31 P1 C41 111.3(5) . . ? 
C31 P1 C1 112.4(6) . . ? 
C41 P1 C1 112.3(5) . . ? 
C31 P1 C21 106.1(6) . . ? 
C41 P1 C21 108.5(5) . . ? 
C1 P1 C21 105.8(5) . . ? 
O10 C11 O1 121.6(11) . . ? 
O10 C11 C12 122.6(11) . . ? 
O1 C11 C12 115.8(11) . . ? 
N1 C12 C13 109.7(10) . . ? 
N1 C12 C11 106.5(9) . . ? 
C13 C12 C11 106.6(11) . . ? 
N1 C12 C14 112.2(11) . . ? 
C13 C12 C14 112.8(10) . . ? 
C11 C12 C14 108.7(10) . . ? 
C26 C21 C22 108.9(11) . . ? 
C26 C21 P1 116.3(10) . . ? 
C22 C21 P1 115.7(8) . . ? 
C23 C22 C21 116.0(11) . . ? 
C22 C23 C24 108.2(14) . . ? 
C25 C24 C23 114.2(15) . . ? 
C26 C25 C24 112.8(12) . . ? 
C25 C26 C21 111.8(11) . . ? 
C36 C31 C32 108.8(11) . . ? 
C36 C31 P1 113.2(8) . . ? 
C32 C31 P1 115.4(8) . . ? 
C31 C32 C33 112.6(10) . . ? 
C34 C33 C32 109.4(10) . . ? 
C33 C34 C35 111.1(13) . . ? 
C36 C35 C34 112.7(12) . . ? 
C35 C36 C31 109.6(11) . . ? 
C42 C41 C46 109.6(9) . . ? 
C42 C41 P1 116.0(7) . . ? 
C46 C41 P1 112.2(7) . . ? 
C43 C42 C41 110.2(9) . . ? 
C42 C43 C44 112.9(9) . . ? 
C43 C44 C45 110.9(9) . . ? 
C44 C45 C46 112.2(10) . . ? 
C45 C46 C41 110.2(9) . . ? 
Cl91 C90 Cl92 106.5 . . ? 
  
_diffrn_measured_fraction_theta_max    0.994 
_diffrn_reflns_theta_full              23.36 
_diffrn_measured_fraction_theta_full   0.994 
_refine_diff_density_max    0.452 
_refine_diff_density_min   -0.384 
_refine_diff_density_rms    0.091 
  
#===END
  
data_Compound_4_(etan) 
  
_audit_creation_method            SHELXL-97 
_chemical_name_systematic 
; 
 ? 
; 
_chemical_name_common             ? 
_chemical_melting_point           ? 
_chemical_formula_moiety          ? 
_chemical_formula_sum 
 'C27 H41 Cl2 Mn Mo N O6 P S2' 
_chemical_formula_weight          792.48 
  
loop_ 
 _atom_type_symbol 
 _atom_type_description 
 _atom_type_scat_dispersion_real 
 _atom_type_scat_dispersion_imag 
 _atom_type_scat_source 
 'C'  'C'   0.0033   0.0016 
 'International Tables Vol C Tables 4.2.6.8 and 6.1.1.4' 
 'H'  'H'   0.0000   0.0000 
 'International Tables Vol C Tables 4.2.6.8 and 6.1.1.4' 
 'N'  'N'   0.0061   0.0033 
 'International Tables Vol C Tables 4.2.6.8 and 6.1.1.4' 
 'O'  'O'   0.0106   0.0060 
 'International Tables Vol C Tables 4.2.6.8 and 6.1.1.4' 
 'P'  'P'   0.1023   0.0942 
 'International Tables Vol C Tables 4.2.6.8 and 6.1.1.4' 
 'S'  'S'   0.1246   0.1234 
 'International Tables Vol C Tables 4.2.6.8 and 6.1.1.4' 
 'Mn'  'Mn'   0.3368   0.7283 
 'International Tables Vol C Tables 4.2.6.8 and 6.1.1.4' 
 'Mo'  'Mo'  -1.6832   0.6857 
 'International Tables Vol C Tables 4.2.6.8 and 6.1.1.4' 
 'Cl'  'Cl'   0.1484   0.1585 
 'International Tables Vol C Tables 4.2.6.8 and 6.1.1.4' 
  
_symmetry_cell_setting            Orthorhombic 
_symmetry_space_group_name_H-M    P2(1)2(1)2(1) 
  
loop_ 
 _symmetry_equiv_pos_as_xyz 
 'x, y, z' 
 '-x+1/2, -y, z+1/2' 
 '-x, y+1/2, -z+1/2' 
 'x+1/2, -y+1/2, -z' 
  
_cell_length_a                    9.8292(14) 
_cell_length_b                    12.8954(18) 
_cell_length_c                    26.883(4) 
_cell_angle_alpha                 90.00 
_cell_angle_beta                  90.00 
_cell_angle_gamma                 90.00 
_cell_volume                      3407.5(8) 
_cell_formula_units_Z             4 
_cell_measurement_temperature     571(2) 
_cell_measurement_reflns_used     ? 
_cell_measurement_theta_min       ? 
_cell_measurement_theta_max       ? 
  
_exptl_crystal_description        prism 
_exptl_crystal_colour             red-brown 
_exptl_crystal_size_max           0.1 
_exptl_crystal_size_mid           0.12 
_exptl_crystal_size_min           0.32 
_exptl_crystal_density_meas       ? 
_exptl_crystal_density_diffrn     1.545 
_exptl_crystal_density_method     'not measured' 
_exptl_crystal_F_000              1624 
_exptl_absorpt_coefficient_mu     1.104 
_exptl_absorpt_correction_type    sadabs 
_exptl_absorpt_correction_T_min   0.788797 
_exptl_absorpt_correction_T_max   1.000000 
_exptl_absorpt_process_details    ? 
  
_exptl_special_details 
; 
 ? 
; 
  
_diffrn_ambient_temperature       571(2) 
_diffrn_radiation_wavelength      0.71073 
_diffrn_radiation_type            MoK\a 
_diffrn_radiation_source          'fine-focus sealed tube' 
_diffrn_radiation_monochromator   graphite 
_diffrn_measurement_device_type   'CCD area detector' 
_diffrn_measurement_method        'phi and omega scans' 
_diffrn_detector_area_resol_mean  ? 
_diffrn_standards_number          ? 
_diffrn_standards_interval_count  ? 
_diffrn_standards_interval_time   ? 
_diffrn_standards_decay_%         ? 
_diffrn_reflns_number             15761 
_diffrn_reflns_av_R_equivalents   0.0340 
_diffrn_reflns_av_sigmaI/netI     0.0344 
_diffrn_reflns_limit_h_min        -10 
_diffrn_reflns_limit_h_max        8 
_diffrn_reflns_limit_k_min        -13 
_diffrn_reflns_limit_k_max        14 
_diffrn_reflns_limit_l_min        -29 
_diffrn_reflns_limit_l_max        29 
_diffrn_reflns_theta_min          1.51 
_diffrn_reflns_theta_max          23.27 
_reflns_number_total              4888 
_reflns_number_gt                 4471 
_reflns_threshold_expression      >2sigma(I) 
  
_computing_data_collection        'Bruker SMART' 
_computing_cell_refinement        'Bruker SMART' 
_computing_data_reduction         'Bruker SHELXTL' 
_computing_structure_solution     'SHELXS-97 (Sheldrick, 1990)' 
_computing_structure_refinement   'SHELXL-97 (Sheldrick, 1997)' 
_computing_molecular_graphics     'Bruker SHELXTL' 
_computing_publication_material   'Bruker SHELXTL' 
  
_refine_special_details 
; 
 Refinement of F^2^ against ALL reflections.  The weighted R-factor wR and 
 goodness of fit S are based on F^2^, conventional R-factors R are based 
 on F, with F set to zero for negative F^2^. The threshold expression of 
 F^2^ > 2sigma(F^2^) is used only for calculating R-factors(gt) etc. and is 
 not relevant to the choice of reflections for refinement.  R-factors based 
 on F^2^ are statistically about twice as large as those based on F, and R- 
 factors based on ALL data will be even larger. 
; 
  
_refine_ls_structure_factor_coef  Fsqd 
_refine_ls_matrix_type            full 
_refine_ls_weighting_scheme       calc 
_refine_ls_weighting_details 
 'calc w=1/[\s^2^(Fo^2^)+(0.0351P)^2^+1.6480P] where P=(Fo^2^+2Fc^2^)/3' 
_atom_sites_solution_primary      direct 
_atom_sites_solution_secondary    difmap 
_atom_sites_solution_hydrogens    geom 
_refine_ls_hydrogen_treatment     mixed 
_refine_ls_extinction_method      none 
_refine_ls_extinction_coef        ? 
_refine_ls_abs_structure_details 
 'Flack H D (1983), Acta Cryst. A39, 876-881' 
_refine_ls_abs_structure_Flack    0.02(3) 
_refine_ls_number_reflns          4888 
_refine_ls_number_parameters      370 
_refine_ls_number_restraints      0 
_refine_ls_R_factor_all           0.0370 
_refine_ls_R_factor_gt            0.0317 
_refine_ls_wR_factor_ref          0.0728 
_refine_ls_wR_factor_gt           0.0709 
_refine_ls_goodness_of_fit_ref    1.061 
_refine_ls_restrained_S_all       1.061 
_refine_ls_shift/su_max           0.024 
_refine_ls_shift/su_mean          0.001 
  
loop_ 
 _atom_site_label 
 _atom_site_type_symbol 
 _atom_site_fract_x 
 _atom_site_fract_y 
 _atom_site_fract_z 
 _atom_site_U_iso_or_equiv 
 _atom_site_adp_type 
 _atom_site_occupancy 
 _atom_site_symmetry_multiplicity 
 _atom_site_calc_flag 
 _atom_site_refinement_flags 
 _atom_site_disorder_assembly 
 _atom_site_disorder_group 
Mn1 Mn 0.26312(7) 0.26683(6) 0.12746(3) 0.04036(19) Uani 1 1 d . . . 
Mo1 Mo 0.43563(4) 0.14166(3) 0.047278(14) 0.03206(11) Uani 1 1 d . . . 
S1 S 0.49116(12) 0.19836(9) 0.13766(4) 0.0392(3) Uani 1 1 d . . . 
S2 S 0.25233(12) 0.08692(9) 0.10446(4) 0.0382(3) Uani 1 1 d . . . 
P1 P 0.49326(13) -0.04182(10) 0.14939(5) 0.0388(3) Uani 1 1 d . . . 
N1 N 0.5718(4) 0.2581(3) 0.01224(14) 0.0423(9) Uani 1 1 d . . . 
H1A H 0.6342 0.2804 0.0343 0.051 Uiso 1 1 calc R . . 
H1B H 0.6154 0.2301 -0.0139 0.051 Uiso 1 1 calc R . . 
C1 C 0.4273(5) 0.0732(3) 0.11925(15) 0.0363(10) Uani 1 1 d . . . 
O1 O 0.3189(3) 0.2850(2) 0.05319(11) 0.0361(7) Uani 1 1 d . . . 
C2 C 0.3425(5) 0.0782(4) -0.0090(2) 0.0447(12) Uani 1 1 d . . . 
O2 O 0.2873(4) 0.0329(3) -0.03977(15) 0.0705(11) Uani 1 1 d . . . 
C3 C 0.5560(6) 0.0331(4) 0.02281(18) 0.0434(11) Uani 1 1 d . . . 
O3 O 0.6238(4) -0.0275(3) 0.00258(15) 0.0606(10) Uani 1 1 d . . . 
C4 C 0.0910(6) 0.3034(4) 0.11473(19) 0.0528(14) Uani 1 1 d . . . 
O4 O -0.0210(4) 0.3285(4) 0.10835(17) 0.0812(14) Uani 1 1 d . . . 
C5 C 0.2138(6) 0.2372(4) 0.1895(2) 0.0557(14) Uani 1 1 d . . . 
O5 O 0.1765(5) 0.2185(3) 0.22906(16) 0.0803(14) Uani 1 1 d . . . 
C6 C 0.3040(6) 0.3972(4) 0.14625(19) 0.0519(14) Uani 1 1 d . . . 
O6 O 0.3271(5) 0.4794(3) 0.16080(17) 0.0823(14) Uani 1 1 d . . . 
C10 C 0.3953(5) 0.3732(3) 0.03834(19) 0.0436(12) Uani 1 1 d . . . 
H10A H 0.4502 0.3975 0.0660 0.052 Uiso 1 1 calc R . . 
H10B H 0.3341 0.4287 0.0286 0.052 Uiso 1 1 calc R . . 
C11 C 0.4847(5) 0.3454(4) -0.00417(18) 0.0451(12) Uani 1 1 d . . . 
H11A H 0.4303 0.3249 -0.0326 0.054 Uiso 1 1 calc R . . 
H11B H 0.5404 0.4043 -0.0136 0.054 Uiso 1 1 calc R . . 
C21 C 0.6653(5) -0.0083(4) 0.16880(18) 0.0444(12) Uani 1 1 d . . . 
H21 H 0.6560 0.0582 0.1861 0.053 Uiso 1 1 calc R . . 
C22 C 0.7333(6) -0.0807(5) 0.2066(2) 0.0593(15) Uani 1 1 d . . . 
H22A H 0.6718 -0.0941 0.2341 0.071 Uiso 1 1 calc R . . 
H22B H 0.7555 -0.1464 0.1910 0.071 Uiso 1 1 calc R . . 
C23 C 0.8627(6) -0.0288(5) 0.2258(2) 0.0696(18) Uani 1 1 d . . . 
H23A H 0.8392 0.0352 0.2426 0.083 Uiso 1 1 calc R . . 
H23B H 0.9068 -0.0740 0.2497 0.083 Uiso 1 1 calc R . . 
C24 C 0.9601(6) -0.0056(5) 0.1837(2) 0.0726(18) Uani 1 1 d . . . 
H24A H 0.9902 -0.0701 0.1688 0.087 Uiso 1 1 calc R . . 
H24B H 1.0395 0.0299 0.1967 0.087 Uiso 1 1 calc R . . 
C25 C 0.8933(5) 0.0614(5) 0.1443(2) 0.0678(17) Uani 1 1 d . . . 
H25A H 0.9554 0.0700 0.1166 0.081 Uiso 1 1 calc R . . 
H25B H 0.8748 0.1294 0.1581 0.081 Uiso 1 1 calc R . . 
C26 C 0.7607(5) 0.0137(4) 0.1256(2) 0.0566(14) Uani 1 1 d . . . 
H26A H 0.7172 0.0610 0.1025 0.068 Uiso 1 1 calc R . . 
H26B H 0.7802 -0.0503 0.1081 0.068 Uiso 1 1 calc R . . 
C31 C 0.4900(6) -0.1480(4) 0.1057(2) 0.0560(14) Uani 1 1 d . . . 
H31 H 0.5425 -0.1242 0.0768 0.067 Uiso 1 1 calc R . . 
C36 C 0.5589(7) -0.2498(4) 0.1225(2) 0.0706(16) Uani 1 1 d . . . 
H36A H 0.6495 -0.2351 0.1349 0.085 Uiso 1 1 calc R . . 
H36B H 0.5067 -0.2810 0.1492 0.085 Uiso 1 1 calc R . . 
C35 C 0.5675(10) -0.3254(5) 0.0783(3) 0.099(2) Uani 1 1 d . . . 
H35A H 0.6264 -0.2963 0.0529 0.119 Uiso 1 1 calc R . . 
H35B H 0.6073 -0.3902 0.0893 0.119 Uiso 1 1 calc R . . 
C34 C 0.4299(10) -0.3461(5) 0.0563(3) 0.098(2) Uani 1 1 d . . . 
H34A H 0.4400 -0.3893 0.0270 0.118 Uiso 1 1 calc R . . 
H34B H 0.3751 -0.3839 0.0803 0.118 Uiso 1 1 calc R . . 
C33 C 0.3578(9) -0.2479(5) 0.0423(3) 0.105(3) Uani 1 1 d . . . 
H33A H 0.2670 -0.2646 0.0307 0.126 Uiso 1 1 calc R . . 
H33B H 0.4062 -0.2149 0.0151 0.126 Uiso 1 1 calc R . . 
C32 C 0.3476(7) -0.1723(5) 0.0857(3) 0.079(2) Uani 1 1 d . . . 
H32A H 0.2925 -0.2024 0.1119 0.095 Uiso 1 1 calc R . . 
H32B H 0.3040 -0.1088 0.0747 0.095 Uiso 1 1 calc R . . 
C41 C 0.3856(7) -0.0656(5) 0.2041(2) 0.0671(18) Uani 1 1 d . . . 
H41 H 0.2937 -0.0515 0.1918 0.081 Uiso 1 1 calc R . . 
C42 C 0.3733(8) -0.1681(6) 0.2260(3) 0.093(2) Uani 1 1 d . . . 
H42A H 0.4597 -0.1874 0.2408 0.112 Uiso 1 1 calc R . . 
H42B H 0.3532 -0.2178 0.2000 0.112 Uiso 1 1 calc R . . 
C43 C 0.2622(8) -0.1740(6) 0.2657(3) 0.098(3) Uani 1 1 d . . . 
H43A H 0.1737 -0.1636 0.2505 0.117 Uiso 1 1 calc R . . 
H43B H 0.2630 -0.2418 0.2813 0.117 Uiso 1 1 calc R . . 
C44 C 0.2874(11) -0.0906(7) 0.3046(3) 0.123(4) Uani 1 1 d . . . 
H44A H 0.2128 -0.0914 0.3282 0.147 Uiso 1 1 calc R . . 
H44B H 0.3699 -0.1077 0.3226 0.147 Uiso 1 1 calc R . . 
C45 C 0.3002(9) 0.0091(7) 0.2854(3) 0.107(3) Uani 1 1 d . . . 
H45A H 0.3258 0.0559 0.3121 0.129 Uiso 1 1 calc R . . 
H45B H 0.2127 0.0315 0.2727 0.129 Uiso 1 1 calc R . . 
C46 C 0.4057(6) 0.0164(5) 0.2439(2) 0.0645(16) Uani 1 1 d . . . 
H46A H 0.4002 0.0845 0.2286 0.077 Uiso 1 1 calc R . . 
H46B H 0.4959 0.0089 0.2580 0.077 Uiso 1 1 calc R . . 
C50 C 0.0089(14) 0.1429(9) 0.3944(4) 0.176(5) Uani 1 1 d . . . 
H50A H 0.0923 0.1043 0.3996 0.211 Uiso 1 1 calc R . . 
H50B H -0.0620 0.1104 0.4141 0.211 Uiso 1 1 calc R . . 
Cl51 Cl 0.0310(4) 0.2653(4) 0.41389(12) 0.1947(16) Uani 1 1 d . . . 
Cl52 Cl -0.0338(6) 0.1380(4) 0.33436(16) 0.252(2) Uani 1 1 d . . . 
  
loop_ 
 _atom_site_aniso_label 
 _atom_site_aniso_U_11 
 _atom_site_aniso_U_22 
 _atom_site_aniso_U_33 
 _atom_site_aniso_U_23 
 _atom_site_aniso_U_13 
 _atom_site_aniso_U_12 
Mn1 0.0383(4) 0.0417(4) 0.0412(4) -0.0068(3) 0.0032(3) 0.0033(3) 
Mo1 0.0299(2) 0.03078(19) 0.03552(19) -0.00094(18) 0.00107(19) -0.00098(17) 
S1 0.0371(7) 0.0371(7) 0.0435(7) -0.0028(5) -0.0056(6) -0.0032(5) 
S2 0.0291(6) 0.0420(6) 0.0435(7) -0.0020(5) 0.0031(6) -0.0044(5) 
P1 0.0379(7) 0.0371(7) 0.0416(7) 0.0085(6) -0.0011(6) -0.0053(5) 
N1 0.043(2) 0.037(2) 0.047(2) 0.0020(18) 0.012(2) -0.001(2) 
C1 0.034(2) 0.038(2) 0.037(2) 0.000(2) 0.002(2) -0.004(2) 
O1 0.0341(17) 0.0314(16) 0.0428(18) -0.0045(14) 0.0011(16) 0.0014(13) 
C2 0.042(3) 0.041(3) 0.051(3) 0.002(3) -0.001(3) 0.002(2) 
O2 0.074(3) 0.075(3) 0.063(3) -0.028(2) -0.015(2) -0.017(2) 
C3 0.036(3) 0.041(3) 0.053(3) 0.003(2) -0.001(3) -0.009(3) 
O3 0.061(3) 0.049(2) 0.072(3) -0.006(2) 0.026(2) 0.0111(19) 
C4 0.051(4) 0.064(4) 0.044(3) -0.014(3) 0.010(3) 0.003(3) 
O4 0.048(3) 0.108(4) 0.087(3) -0.003(3) -0.005(2) 0.028(2) 
C5 0.062(4) 0.043(3) 0.063(4) -0.011(3) 0.005(3) -0.004(3) 
O5 0.118(4) 0.071(3) 0.052(2) -0.007(2) 0.029(3) -0.010(3) 
C6 0.058(4) 0.055(4) 0.043(3) -0.002(3) 0.001(3) 0.007(3) 
O6 0.127(4) 0.046(3) 0.074(3) -0.019(2) 0.005(3) -0.007(2) 
C10 0.044(3) 0.026(2) 0.061(3) 0.004(2) -0.005(2) -0.0007(19) 
C11 0.048(3) 0.037(3) 0.050(3) 0.008(2) 0.003(2) -0.003(2) 
C21 0.038(3) 0.051(3) 0.045(3) 0.007(2) -0.004(2) -0.001(2) 
C22 0.050(3) 0.066(4) 0.062(3) 0.029(3) -0.007(3) 0.002(3) 
C23 0.054(4) 0.086(5) 0.069(4) 0.024(3) -0.026(3) -0.009(3) 
C24 0.049(4) 0.091(5) 0.077(4) 0.016(3) -0.015(3) -0.007(3) 
C25 0.040(3) 0.090(5) 0.073(4) 0.020(4) -0.004(3) -0.007(3) 
C26 0.040(3) 0.068(4) 0.062(3) 0.013(3) -0.002(3) 0.001(3) 
C31 0.073(4) 0.036(3) 0.058(3) 0.005(3) 0.003(3) -0.006(3) 
C36 0.072(4) 0.052(3) 0.088(4) -0.007(3) -0.012(4) 0.014(3) 
C35 0.123(7) 0.058(4) 0.117(6) -0.026(4) 0.025(6) 0.007(5) 
C34 0.160(8) 0.046(4) 0.089(5) -0.013(3) 0.004(6) -0.019(5) 
C33 0.166(8) 0.056(4) 0.094(5) -0.010(4) -0.053(5) -0.017(4) 
C32 0.097(5) 0.042(4) 0.099(5) -0.005(3) -0.043(4) 0.000(3) 
C41 0.080(5) 0.073(4) 0.049(3) 0.008(3) 0.007(3) -0.030(3) 
C42 0.107(6) 0.083(5) 0.090(5) 0.013(4) 0.013(4) -0.008(4) 
C43 0.084(5) 0.091(5) 0.118(6) 0.050(5) 0.045(5) -0.012(4) 
C44 0.195(10) 0.088(6) 0.086(6) 0.026(5) 0.059(6) 0.026(6) 
C45 0.131(7) 0.129(8) 0.063(4) -0.002(5) 0.026(5) -0.022(6) 
C46 0.066(4) 0.078(4) 0.049(3) 0.008(3) 0.002(3) -0.015(3) 
C50 0.229(14) 0.126(9) 0.172(11) 0.078(9) -0.007(10) 0.002(9) 
Cl51 0.204(4) 0.222(4) 0.158(3) 0.027(3) -0.057(3) -0.079(3) 
Cl52 0.305(6) 0.277(5) 0.173(3) -0.092(4) 0.018(4) 0.018(5) 
  
_geom_special_details 
; 
 All esds (except the esd in the dihedral angle between two l.s. planes) 
 are estimated using the full covariance matrix.  The cell esds are taken 
 into account individually in the estimation of esds in distances, angles 
 and torsion angles; correlations between esds in cell parameters are only 
 used when they are defined by crystal symmetry.  An approximate (isotropic) 
 treatment of cell esds is used for estimating esds involving l.s. planes. 
; 
  
loop_ 
 _geom_bond_atom_site_label_1 
 _geom_bond_atom_site_label_2 
 _geom_bond_distance 
 _geom_bond_site_symmetry_2 
 _geom_bond_publ_flag 
Mn1 C5 1.777(6) . ? 
Mn1 C4 1.790(6) . ? 
Mn1 C6 1.801(6) . ? 
Mn1 O1 2.084(3) . ? 
Mn1 S2 2.4034(14) . ? 
Mn1 S1 2.4246(15) . ? 
Mn1 Mo1 3.1823(8) . ? 
Mo1 C3 1.948(5) . ? 
Mo1 C2 1.948(5) . ? 
Mo1 C1 2.128(4) . ? 
Mo1 O1 2.182(3) . ? 
Mo1 N1 2.221(4) . ? 
Mo1 S2 2.4714(12) . ? 
Mo1 S1 2.5955(13) . ? 
S1 C1 1.800(4) . ? 
S2 C1 1.774(5) . ? 
P1 C31 1.805(6) . ? 
P1 C1 1.811(4) . ? 
P1 C21 1.822(5) . ? 
P1 C41 1.838(6) . ? 
N1 C11 1.481(6) . ? 
O1 C10 1.420(5) . ? 
C2 O2 1.150(6) . ? 
C3 O3 1.162(6) . ? 
C4 O4 1.160(6) . ? 
C5 O5 1.152(6) . ? 
C6 O6 1.152(6) . ? 
C10 C11 1.485(7) . ? 
C21 C26 1.519(7) . ? 
C21 C22 1.534(7) . ? 
C22 C23 1.526(8) . ? 
C23 C24 1.512(8) . ? 
C24 C25 1.515(8) . ? 
C25 C26 1.526(8) . ? 
C31 C32 1.532(8) . ? 
C31 C36 1.544(8) . ? 
C36 C35 1.541(8) . ? 
C35 C34 1.499(12) . ? 
C34 C33 1.499(10) . ? 
C33 C32 1.523(9) . ? 
C41 C42 1.452(9) . ? 
C41 C46 1.516(8) . ? 
C42 C43 1.529(10) . ? 
C43 C44 1.520(11) . ? 
C44 C45 1.391(11) . ? 
C45 C46 1.527(9) . ? 
C50 Cl52 1.670(12) . ? 
C50 Cl51 1.676(12) . ? 
  
loop_ 
 _geom_angle_atom_site_label_1 
 _geom_angle_atom_site_label_2 
 _geom_angle_atom_site_label_3 
 _geom_angle 
 _geom_angle_site_symmetry_1 
 _geom_angle_site_symmetry_3 
 _geom_angle_publ_flag 
C5 Mn1 C4 88.8(2) . . ? 
C5 Mn1 C6 89.9(2) . . ? 
C4 Mn1 C6 91.1(2) . . ? 
C5 Mn1 O1 174.00(19) . . ? 
C4 Mn1 O1 92.06(18) . . ? 
C6 Mn1 O1 96.01(18) . . ? 
C5 Mn1 S2 91.25(17) . . ? 
C4 Mn1 S2 99.41(17) . . ? 
C6 Mn1 S2 169.47(18) . . ? 
O1 Mn1 S2 82.76(8) . . ? 
C5 Mn1 S1 93.88(19) . . ? 
C4 Mn1 S1 172.60(17) . . ? 
C6 Mn1 S1 95.84(18) . . ? 
O1 Mn1 S1 84.62(9) . . ? 
S2 Mn1 S1 73.64(4) . . ? 
C5 Mn1 Mo1 132.18(18) . . ? 
C4 Mn1 Mo1 120.53(16) . . ? 
C6 Mn1 Mo1 122.99(18) . . ? 
O1 Mn1 Mo1 42.94(8) . . ? 
S2 Mn1 Mo1 50.18(3) . . ? 
S1 Mn1 Mo1 53.08(3) . . ? 
C3 Mo1 C2 73.8(2) . . ? 
C3 Mo1 C1 91.86(18) . . ? 
C2 Mo1 C1 120.89(19) . . ? 
C3 Mo1 O1 162.41(16) . . ? 
C2 Mo1 O1 99.55(17) . . ? 
C1 Mo1 O1 105.37(14) . . ? 
C3 Mo1 N1 88.67(16) . . ? 
C2 Mo1 N1 103.78(18) . . ? 
C1 Mo1 N1 133.55(16) . . ? 
O1 Mo1 N1 76.97(13) . . ? 
C3 Mo1 S2 116.60(14) . . ? 
C2 Mo1 S2 91.16(15) . . ? 
C1 Mo1 S2 44.61(13) . . ? 
O1 Mo1 S2 79.25(8) . . ? 
N1 Mo1 S2 153.65(10) . . ? 
C3 Mo1 S1 113.01(15) . . ? 
C2 Mo1 S1 160.72(15) . . ? 
C1 Mo1 S1 43.42(12) . . ? 
O1 Mo1 S1 78.68(9) . . ? 
N1 Mo1 S1 94.58(10) . . ? 
S2 Mo1 S1 69.60(4) . . ? 
C3 Mo1 Mn1 156.51(14) . . ? 
C2 Mo1 Mn1 119.26(15) . . ? 
C1 Mo1 Mn1 64.79(12) . . ? 
O1 Mo1 Mn1 40.59(8) . . ? 
N1 Mo1 Mn1 105.38(10) . . ? 
S2 Mo1 Mn1 48.33(3) . . ? 
S1 Mo1 Mn1 48.32(3) . . ? 
C1 S1 Mn1 88.46(16) . . ? 
C1 S1 Mo1 54.33(13) . . ? 
Mn1 S1 Mo1 78.60(4) . . ? 
C1 S2 Mn1 89.74(15) . . ? 
C1 S2 Mo1 57.38(14) . . ? 
Mn1 S2 Mo1 81.49(4) . . ? 
C31 P1 C1 108.9(2) . . ? 
C31 P1 C21 112.5(2) . . ? 
C1 P1 C21 105.4(2) . . ? 
C31 P1 C41 112.6(3) . . ? 
C1 P1 C41 106.8(3) . . ? 
C21 P1 C41 110.2(3) . . ? 
C11 N1 Mo1 107.0(3) . . ? 
S2 C1 S1 108.1(2) . . ? 
S2 C1 P1 121.9(3) . . ? 
S1 C1 P1 119.1(3) . . ? 
S2 C1 Mo1 78.01(17) . . ? 
S1 C1 Mo1 82.25(17) . . ? 
P1 C1 Mo1 137.1(2) . . ? 
C10 O1 Mn1 119.9(3) . . ? 
C10 O1 Mo1 112.3(2) . . ? 
Mn1 O1 Mo1 96.47(12) . . ? 
O2 C2 Mo1 174.1(5) . . ? 
O3 C3 Mo1 171.8(4) . . ? 
O4 C4 Mn1 177.3(5) . . ? 
O5 C5 Mn1 177.2(6) . . ? 
O6 C6 Mn1 176.2(5) . . ? 
O1 C10 C11 109.6(4) . . ? 
N1 C11 C10 107.2(4) . . ? 
C26 C21 C22 110.6(4) . . ? 
C26 C21 P1 113.5(4) . . ? 
C22 C21 P1 116.8(4) . . ? 
C23 C22 C21 108.6(5) . . ? 
C24 C23 C22 111.3(5) . . ? 
C23 C24 C25 111.2(5) . . ? 
C24 C25 C26 111.7(5) . . ? 
C21 C26 C25 110.6(5) . . ? 
C32 C31 C36 109.2(5) . . ? 
C32 C31 P1 113.6(4) . . ? 
C36 C31 P1 116.5(4) . . ? 
C35 C36 C31 109.6(5) . . ? 
C34 C35 C36 111.5(6) . . ? 
C33 C34 C35 112.0(6) . . ? 
C34 C33 C32 112.3(6) . . ? 
C33 C32 C31 109.8(6) . . ? 
C42 C41 C46 111.1(5) . . ? 
C42 C41 P1 121.6(5) . . ? 
C46 C41 P1 111.9(4) . . ? 
C41 C42 C43 112.8(6) . . ? 
C44 C43 C42 109.2(7) . . ? 
C45 C44 C43 114.4(7) . . ? 
C44 C45 C46 112.9(8) . . ? 
C41 C46 C45 112.6(5) . . ? 
Cl52 C50 Cl51 111.7(6) . . ? 
  
_diffrn_measured_fraction_theta_max    0.999 
_diffrn_reflns_theta_full              23.27 
_diffrn_measured_fraction_theta_full   0.999 
_refine_diff_density_max    0.753 
_refine_diff_density_min   -0.334 
_refine_diff_density_rms    0.059 
 
#===END
  
